# Supplementary material for: Human Wharton’s jelly mesenchymal stem cells promote skin wound healing through paracrine signaling
Source: Springer Nature journal article supplement (doi:10.1186/scrt417), 2014-02-24
Supplement: 13287_2013_456_MOESM2_ESM.pdf [file 13287_2013_456_MOESM2_ESM.pdf]

**Table S1: Primer sequences for RT-PCR.**

| <b>Gene</b>                  | <b>Forward primer sequence</b> | <b>Reverse sequence primer</b> |
|------------------------------|--------------------------------|--------------------------------|
| <i>TGF-β1</i>                | GGCTTTCGCCTTAGCGCCCA           | CTCGGCGGCCGGTAGTGAAC           |
| <i>TGF-β2</i>                | CTTTGGATGCGGCCTATTGCT          | AGCTGTTCAATCTTGGGTGTTT         |
| <i>TGF-β3</i>                | GCTGAGACCCACGTGCGAC            | GTGTTTCCCGAGGAGCGGGC           |
| <i>CTGF</i>                  | TGCCCGGGAAATGCTGCGAG           | CAGTCGGTAAGCCGCGAGGG           |
| <i>PAI-1</i>                 | TGGCACGGTGGCCTCCTCAT           | TCCTGTGGGGTTGTGCCGGA           |
| <i>HIF-1-α</i>               | GATCACCTCTTCGTCGCTT            | AAGGAAAGGCAAGTCCAGAGG          |
| <i>VEGF</i>                  | ACGAAAGCGCAAGAAATCCC           | CTCCAGGGCATTAGACAGCA           |
| <i>FGF-2</i>                 | CTGGCTATGAAGGAAGATGGA          | TGCCCAGTTCGTTTCAGTG            |
| <i>Decorin</i>               | CGCCTCATCTGAGGGAGCTT           | TACTGGACCGGGTTGCTGAA           |
| <i>Collagen<br/>type I</i>   | GGCCAAGACGAAGACATCCACCAA       | TGCCGTTGTTCGCAGACGCAGAT        |
| <i>Collagen<br/>type III</i> | GAGGTGGTGCAGGTGAGCCTGGTAA      | GATCCATCCTTGCCATCTTCGCCTT      |
| <i>18S</i>                   | GTAACCCGTTGAACCCCAT            | CCATCCAATCGGTAGTAGCG           |

**Figure legend:**

List of SYBR® Green gene primer sequences used in real time PCR for present work.

\* Abbreviations: *TGF- $\beta$* : *Transforming Growth Factor-  $\beta$* ; *CTGF*: *Connective Tissue Growth Factor*; *PAI-I*: *Plasminogen Activator Inhibitor-I*; *HIF-1- $\alpha$* : *Hypoxia Inducible Factor-1- $\alpha$* ; *VEGF*: *Vascular Endothelial Growth Factor*; *FGF-2*: *Fibroblast Growth Factor-2*.
